# Supplementary material for: MicroLet-7b Regulates Neutrophil Function and Dampens Neutrophilic Inflammation by Suppressing the Canonical TLR4/NF-κB Pathway
Source: PubMed Central journal article supplement (PMC8044834; doi:10.3389/fimmu.2021.653344), 2021-03-29
Supplement: DataSheet_1.pdf [file DataSheet_1.pdf]

## Supplementary Material

**Supplementary Figure 1.** Toll-like receptor signaling pathway components predicted to be regulated by hsa-let-7b-5p miRNA. Pathway analysis performed using DIANA LAB mirPATH v.3.(1) Predicted hsa-let-7b-5p targets are indicated by red star symbol.

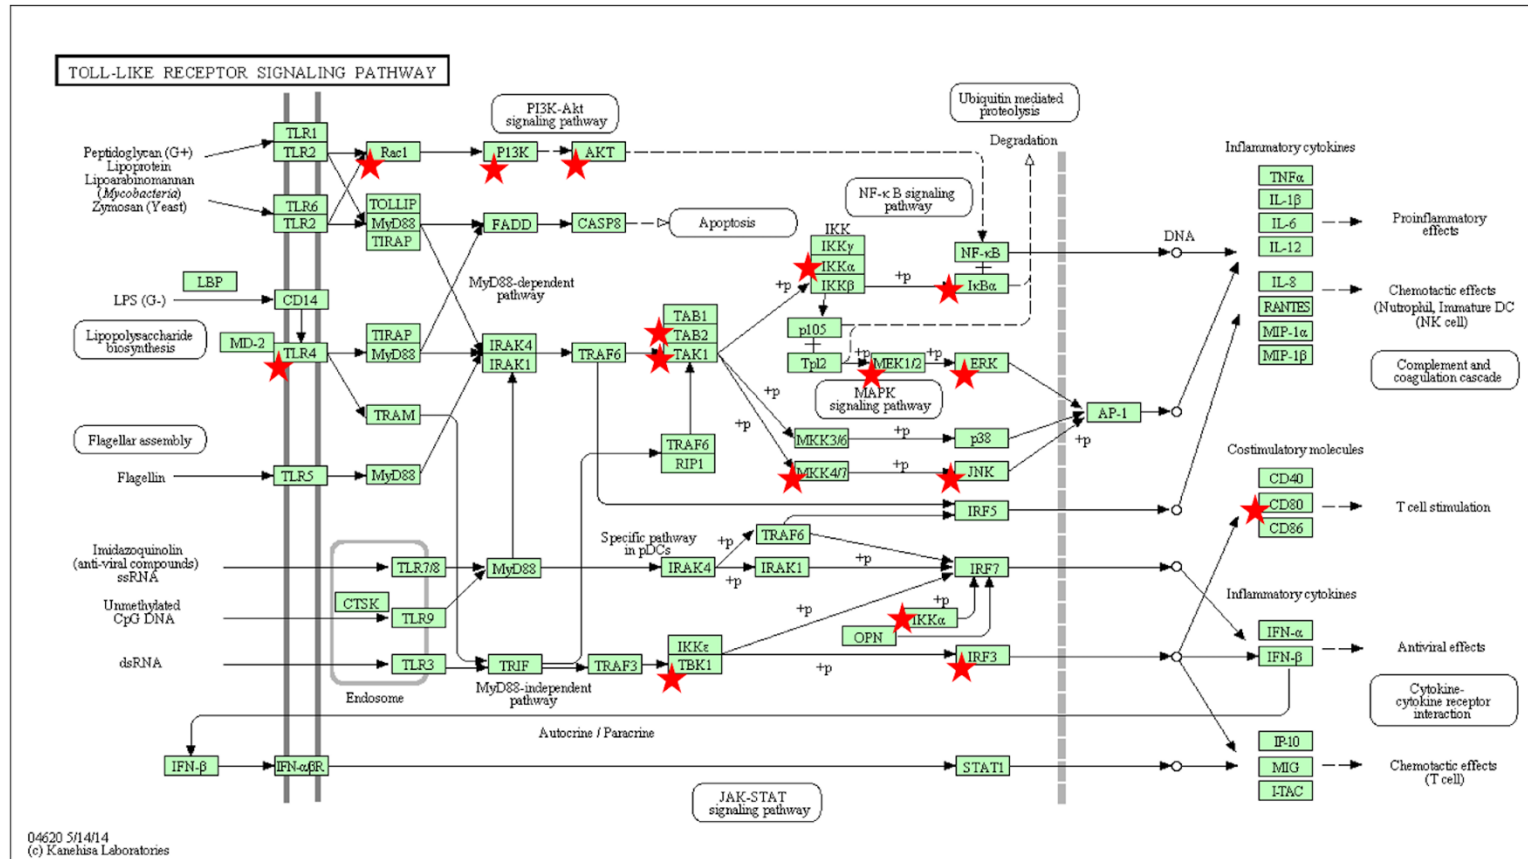

**Supplementary Table 1.** In silico prediction of top ranked miRNA-pathway interactions using Tarbase v7.0

| Pathway                              | HUMAN |                 |              |                 | MOUSE |                |              |                 |
|--------------------------------------|-------|-----------------|--------------|-----------------|-------|----------------|--------------|-----------------|
|                                      | #Rank | miRNA           | p-value      | #genes targeted | #Rank | miRNA          | p-value      | #genes targeted |
| Toll-like receptor signaling pathway | 1     | hsa-miR-34a-5p  | 2.99965E-86  | 30              | 1     | mmu-miR-26a-5p | 2.777324e-44 | 16              |
|                                      | 2     | hsa-miR-522-5p  | 1.09899E-56  | 21              | 2     | mmu-miR-128-3p | 2.777324e-44 | 16              |
|                                      | 3     | hsa-miR-16-5p   | 1.9652E-50   | 19              | 3     | mmu-miR-17-5p  | 2.777324e-44 | 14              |
|                                      | 4     | hsa-miR-17-5p   | 1.9652E-50   | 19              | 4     | mmu-miR-27b-3p | 5.751642e-38 | 14              |
|                                      | 5     | hsa-miR-107     | 2.35394E-47  | 18              | 5     | mmu-miR-27a-3p | 5.751642e-38 | 14              |
|                                      | 6     | hsa-miR-103a-3p | 2.61151E-44  | 17              | 6     | mmu-miR-26b-5p | 5.751642e-38 | 13              |
|                                      | 7     | hsa-let-7a-5p   | 2.61151E-44  | 17              | 7     | mmu-miR-22-3p  | 8.101307e-32 | 12              |
|                                      | 8     | hsa-miR-93-5p   | 2.67585E-41  | 16              | ...   | ...            | ...          | ...             |
|                                      | 9     | hsa-let-7b-5p   | 2.52411E-38  | 15              | 25    | mmu-miR-31-5p  | 5.974400e-23 | 9               |
|                                      | 10    | hsa-miR-15b-5p  | 2.52411E-38  | 15              | 26    | mmu-let-7b-5p  | 5.974400e-23 | 9               |
| NF-kappa B signaling pathway         | 1     | hsa-miR-34a-5p  | 7.858612e-84 | 28              | 1     | mmu-let-7g-5p  | 3.846683e-55 | 19              |
|                                      | 2     | hsa-miR-522-5p  | 5.664637e-50 | 18              | 2     | mmu-let-7i-5p  | 3.452951e-45 | 16              |
|                                      | 3     | hsa-miR-23b-3p  | 5.664637e-50 | 18              | 3     | mmu-miR-27b-3p | 6.008942e-42 | 15              |
|                                      | 4     | hsa-let-7a-5p   | 5.664637e-50 | 18              | 4     | mmu-let-7c-5p  | 6.008942e-42 | 15              |
|                                      | 5     | hsa-let-7g-5p   | 9.090831e-47 | 17              | 5     | mmu-let-7b-5p  | 6.008942e-42 | 15              |
|                                      | 6     | hsa-miR-16-5p   | 9.090831e-47 | 17              | 6     | mmu-miR-27a-3p | 6.008942e-42 | 15              |
|                                      | 7     | hsa-let-7f-5p   | 1.341387e-43 | 16              | 7     | mmu-let-7f-5p  | 9.517234e-39 | 14              |
|                                      | ...   | ...             | ...          | ...             | 8     | mmu-let-7a-5p  | 9.517234e-39 | 14              |
|                                      | 11    | hsa-miR-15a-5p  | 2.240848e-37 | 14              | 9     | mmu-miR-322-5p | 9.517234e-39 | 14              |
|                                      | 12    | hsa-let-7b-5p   | 2.240848e-37 | 14              | 10    | mmu-let-7e-5p  | 9.517234e-39 | 14              |

**Supplementary Table 2.** Tarbase Experimentally Supported Interactions for hsa-let-7b-5p in Toll-like receptor and NF-kappa B signaling pathway

|     | Toll-like receptor signaling pathway |                                 | NF-kappa B signaling pathway |                                 |
|-----|--------------------------------------|---------------------------------|------------------------------|---------------------------------|
| #   | Gene Name                            | Gene Ensembl id                 | Gene Name                    | Gene Ensembl id                 |
| 1.  | MAP2K2                               | <a href="#">ENSG00000126934</a> | CHUK                         | <a href="#">ENSG00000213341</a> |
| 2.  | CD80                                 | <a href="#">ENSG00000121594</a> | TNFRSF11A                    | <a href="#">ENSG00000141655</a> |
| 3.  | CHUK                                 | <a href="#">ENSG00000213341</a> | TLR4                         | <a href="#">ENSG00000136869</a> |
| 4.  | TLR4                                 | <a href="#">ENSG00000136869</a> | TAB2                         | <a href="#">ENSG00000055208</a> |
| 5.  | TAB2                                 | <a href="#">ENSG00000055208</a> | PLCG1                        | <a href="#">ENSG00000124181</a> |
| 6.  | MAPK8                                | <a href="#">ENSG00000107643</a> | NFKBIA                       | <a href="#">ENSG00000100906</a> |
| 7.  | AKT1                                 | <a href="#">ENSG00000142208</a> | PTGS2                        | <a href="#">ENSG00000073756</a> |
| 8.  | IRF3                                 | <a href="#">ENSG00000126456</a> | CSNK2A1                      | <a href="#">ENSG00000101266</a> |
| 9.  | NFKBIA                               | <a href="#">ENSG00000100906</a> | ERC1                         | <a href="#">ENSG00000082805</a> |
| 10. | TBK1                                 | <a href="#">ENSG00000183735</a> | PARP1                        | <a href="#">ENSG00000143799</a> |
| 11. | RAC1                                 | <a href="#">ENSG00000136238</a> | BIRC3                        | <a href="#">ENSG00000023445</a> |
| 12. | PIK3CA                               | <a href="#">ENSG00000121879</a> | TRIM25                       | <a href="#">ENSG00000121060</a> |
| 13. | MAP2K4                               | <a href="#">ENSG00000065559</a> | MAP3K7                       | <a href="#">ENSG00000135341</a> |
| 14. | MAPK1                                | <a href="#">ENSG00000100030</a> | BIRC2                        | <a href="#">ENSG00000110330</a> |
| 15. | MAP3K7                               | <a href="#">ENSG00000135341</a> |                              |                                 |
